# Supplementary material
Source: publisher figshare collection journal article supplement (https://acs.figshare.com/ndownloader/files/4146499)

# First Total Synthesis of Paracaseolide A

Dimitris Noutsias and Georgios Vassilikogiannakis\*

*Department of Chemistry, University of Crete, Vasilika Vouton,  
71003 Iraklion, Crete, Greece*

*vasil@chemistry.uoc.gr*

## Table of contents

**Part A:** Experimental procedures.....S2 – S7

**Part B:** Copies of  $^1\text{H}$ - and  $^{13}\text{C}$ -NMR spectra.....S8 – S26

## Part A: Experimental Procedures

### Preparation of iodide **6**

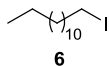

To a solution of the alcohol **5** (2.0 g, 10 mmol) in dry CH<sub>2</sub>Cl<sub>2</sub> (50 mL) at room temperature, imidazole (1.36 g, 20 mmol), PPh<sub>3</sub> (5.24 g, 20 mmol) and I<sub>2</sub> (5.0 g, 19.7 mmol) were added. The reaction mixture was stirred for 30 minutes at room temperature and then Na<sub>2</sub>S<sub>2</sub>O<sub>3</sub> (sat. aq. 30 mL) was added. The layers were separated and the organic solution was concentrated to half its previous volume and then diluted with petroleum ether (30 mL). The Ph<sub>3</sub>P=O that had precipitated, was removed by filtration and the remaining solution was concentrated in *vacuo* and purified by column chromatography (silica gel, petroleum ether:EtOAc = 1:0 → 40:1) to afford the iodide **6** (3.04 g, 98%).

**6**: <sup>1</sup>H NMR (300 MHz, CDCl<sub>3</sub>): δ = 3.18 (t, *J* = 7.1 Hz, 2H), 1.82 (m, 2H), 1.38 (m, 2H), 1.26 (brs, 18H), 0.88 (t, *J* = 6.6 Hz, 3H) ppm; <sup>13</sup>C NMR (75 MHz, CDCl<sub>3</sub>): δ = 33.6, 31.9, 30.5, 29.7, 29.6 (2C), 29.5, 29.4, 29.3, 28.5, 22.7, 14.1, 7.2 ppm.

### Synthesis of furanol **7**

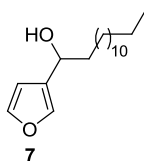

To a solution of iodide **6** (3.0 g, 9.7 mmol) in anhydrous Et<sub>2</sub>O (80 mL) at −78 °C, a solution of *t*-BuLi (12.1 mL of 1.7 M in pentane, 20.6 mmol) was added dropwise. The cooling bath was removed 15 minutes after completion of the addition of *t*-BuLi, and the reaction mixture was allowed stirred at room temperature for 45 minutes. The reaction mixture was recooled to −78 °C and a solution of 3-furaldehyde (535 μL, 6.4 mmol) in anhydrous Et<sub>2</sub>O (10 mL) was added dropwise. The reaction mixture was warmed to room temperature and stirred for 90 minutes and then Et<sub>2</sub>O (10 mL) and NH<sub>4</sub>Cl (sat. aq. 50

mL) were added. The layers were separated and the organic layer was dried with Na<sub>2</sub>SO<sub>4</sub> and concentrated *in vacuo*. The residue was purified by flash column chromatography (silica gel, petroleum ether:EtOAc = 40:1 → 10:1) to afford alcohol **7** (2.61 g, 96%).

**7**: <sup>1</sup>H NMR (300 MHz, CDCl<sub>3</sub>): δ = 7.37 (m, 2H), 6.39 (d, *J* = 1.0 Hz, 1H), 4.62 (t, *J* = 6.6 Hz, 1H), 1.91 (brs, -OH) 1.71 (m, 2H), 1.25 (brs, 22H), 0.88 (t, *J* = 6.7 Hz, 3H) ppm; <sup>13</sup>C NMR (75 MHz, CDCl<sub>3</sub>): δ = 143.2, 138.9, 129.3, 108.4, 67.0, 37.8, 31.9, 29.7, 29.6 (4C), 29.5, 29.4, 29.3, 25.6, 22.7, 14.1 ppm. HRMS (TOF ESI): calcd for C<sub>18</sub>H<sub>32</sub>NaO<sub>2</sub>: 303.2295 [M + Na]<sup>+</sup>; found: 303.2287.

### Silylation of furanol **7**

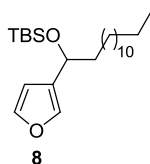

To a solution of the alcohol **7** (1.8 g, 6.4 mmol) in anhydrous DMF (18 mL) at room temperature, imidazole (1.1 g, 16.2 mmol), TBSCl (1.4 g, 9.3 mmol) and 4-DMAP (38 mg, 0.31 mmol) were added. After the reaction solution had been stirred for 12 hours at this temperature, it was quenched with MeOH (0.5 mL). The stirring was continued for a further 1 hour, after which time the mixture was partitioned between Et<sub>2</sub>O (40 mL) and H<sub>2</sub>O (3 × 10 mL). The organic extract was dried with Na<sub>2</sub>SO<sub>4</sub> and the solvent was removed *in vacuo*. The residue was purified by flash column chromatography (silica gel, petroleum ether:EtOAc = 40:1 → 10:1) to afford the TBS-protected furanol **8** (2.12 g, 84%).

**8**: <sup>1</sup>H NMR (300 MHz, CDCl<sub>3</sub>): δ = 7.34 (t, *J* = 1.6 Hz, 1H), 7.28 (d, *J* = 0.7 Hz, 1H), 6.34 (m, 1H), 4.64 (t, *J* = 6.3 Hz, 1H), 1.62 (m, 2H), 1.26 (brs, 22H), 0.88 (m, 9H of *t*-Bu plus 3H of Me), 0.05 (s, 3H), -0.05 (s, 3H) ppm; <sup>13</sup>C NMR (75 MHz, CDCl<sub>3</sub>): δ = 142.7, 138.6, 130.1, 108.8, 67.7, 39.6, 31.9, 29.7 (4C), 29.6 (2C), 29.5, 29.4, 25.8 (3C), 25.3, 22.7, 18.2, 14.1, -4.7, -4.9 ppm. HRMS (TOF ESI): calcd for C<sub>24</sub>H<sub>46</sub>NaO<sub>2</sub>Si: 417.3159 [M + Na]<sup>+</sup>; found: 417.3152.

**[1,4] O→C silyl migration**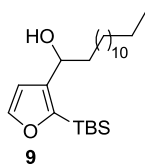

To a stirred solution of TBS-protected furanol **8** (2.0 g, 5.06 mmol) in anhydrous THF (80 mL) at room temperature was added dry HMPA (1.0 mL, 6.07 mmol). The solution was cooled to 0 °C and *n*-BuLi (1.6 M in hexane, 5.7 mL, 9.12 mmol) added dropwise. The reaction mixture was warmed to room temperature and stirred for 30 minutes and then Et<sub>2</sub>O (30 mL) and NH<sub>4</sub>Cl (sat. aq. 40 mL) were added. The layers were separated and the organic layer was dried with Na<sub>2</sub>SO<sub>4</sub> and concentrated *in vacuo*. The residue was purified by flash column chromatography (silica gel, petroleum ether:EtOAc = 10:1) to afford furylic alcohol **9** (1.92 g, 96%).

**9**: <sup>1</sup>H NMR (300 MHz, CDCl<sub>3</sub>): δ = 7.57 (d, *J* = 1.7 Hz, 1H), 6.47 (d, *J* = 1.7 Hz, 1H), 4.73 (t, *J* = 6.6 Hz, 1H), 1.82 (m, 1H), 1.66 (m, 1H plus 1-OH), 1.26 (brs, 22H), 0.92 (s, 9H), 0.88 (t, *J* = 6.6 Hz, 3H), 0.30 (s, 3H), 0.28 (s, 3H) ppm; <sup>13</sup>C NMR (75 MHz, CDCl<sub>3</sub>): δ = 154.2, 146.8, 140.0, 107.7, 66.6, 38.2, 31.9, 29.7 (2C), 29.6 (3C), 29.5(2C), 29.3, 26.4 (3C), 26.1, 22.7, 17.2, 14.1, -5.2, -5.5 ppm. HRMS (TOF ESI): calcd for C<sub>24</sub>H<sub>46</sub>NaO<sub>2</sub>Si: 417.3159 [M + Na]<sup>+</sup>; found: 417.3164.

**Dehydration of furanol 9**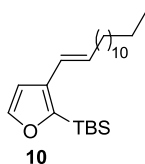

A solution of furylic alcohol **9** (1.9 g, 4.81 mmol), with a catalytic amount of *p*-TsOH (0.05 equiv, 46 mg) and molecular sieves 4Å in toluene (80 mL) was heated in a sealed tube at 140 °C (oil bath temperature) for 12 hours. The reaction mixture was left to cool to room temperature, NaHCO<sub>3</sub> (sat. aq. 30 mL) and Et<sub>2</sub>O (25 mL) were added. The layers were separated and the organic layer was dried with Na<sub>2</sub>SO<sub>4</sub> and concentrated *in vacuo*.

The residue was purified by flash column chromatography (silica gel, petroleum ether:EtOAc = 50:1) to afford olefin **10** (1.41 g, 78%).

**10**:  $^1\text{H}$  NMR (300 MHz,  $\text{CDCl}_3$ ):  $\delta$  = 7.55 (dd,  $J_1$  = 1.7 Hz,  $J_2$  = 0.7 Hz, 1H), 6.57 (d,  $J$  = 1.7 Hz, 1H), 6.43 (d,  $J$  = 15.6 Hz, 1H), 5.98 (dt,  $J_1$  = 15.6 Hz,  $J_2$  = 6.9 Hz, 1H), 2.21 (m, 2H), 1.50 (m, 2H), 1.32 (brs, 18H), 0.96 (s, 9H), 0.94 (t,  $J$  = 6.9 Hz, 3H) 0.35 (s, 6H);  $^{13}\text{C}$  NMR (75 MHz,  $\text{CDCl}_3$ ):  $\delta$  = 154.5, 146.4, 135.3, 130.8, 121.1, 107.4, 33.0, 32.0, 29.8 (2C), 29.7 (2C), 29.6, 29.4 (2C), 29.2, 26.4 (3C), 22.7, 17.7, 14.1, -5.6 (2C) ppm. HRMS (TOF ESI): calcd for  $\text{C}_{24}\text{H}_{45}\text{OSi}$ : 377.3234  $[\text{M} + \text{H}]^+$ ; found: 377.3235.

### Ortho-methylation of furan **10**

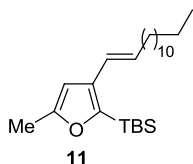

To a solution of furan **10** (950 mg, 2.52 mmol) in anhydrous THF (20 mL), at 0 °C, *n*-BuLi (3.2 mL of 1.6 M solution in hexane, 5.04 mmol) was added dropwise. After 30 min stirring at the same temperature, a solution of  $\text{CH}_3\text{I}$  (471  $\mu\text{L}$ , 7.56 mmol) in anhydrous THF (5 mL) was added dropwise. The reaction mixture was warmed to room temperature and stirred for a further 2 h after which it was partitioned between  $\text{Et}_2\text{O}$  (20 mL) and  $\text{NH}_4\text{Cl}$  (sat. aq. 20 mL). The layers were separated and the organic layer was dried with  $\text{Na}_2\text{SO}_4$  and concentrated *in vacuo*. The residue was purified by flash column chromatography (silica gel, petroleum ether:EtOAc = 50:1) to afford trisubstituted furan **11** (827 mg, 84%).

**11**:  $^1\text{H}$  NMR (300 MHz,  $\text{CDCl}_3$ ):  $\delta$  = 6.33 (d,  $J$  = 15.6 Hz, 1H), 6.14 (s, 1H), 5.87 (dt,  $J_1$  = 15.6 Hz,  $J_2$  = 6.9 Hz, 1H), 2.28 (s, 3H), 2.14 (q,  $J$  = 6.7 Hz, 2H) 1.43 (m, 2H), 1.28 (brs, 18H), 0.92 (s, 9H), 0.90 (t,  $J$  = 6.9 Hz, 3H), 0.29 (s, 6H);  $^{13}\text{C}$  NMR (75 MHz,  $\text{CDCl}_3$ ):  $\delta$  = 156.3, 152.8, 136.4, 130.3, 121.4, 103.7, 33.0, 31.9, 29.7 (4C), 29.5, 29.4 (2C), 29.1, 26.5 (3C), 22.7, 17.6, 14.1, 13.7, -5.4 (2C) ppm. HRMS (TOF ESI): calcd for  $\text{C}_{25}\text{H}_{47}\text{OSi}$ : 391.3391  $[\text{M} + \text{H}]^+$ ; found: 391.3388.

### Photooxygenation of furan **11**

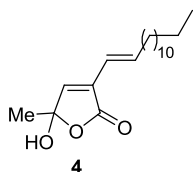

A solution of the furan **11** (300 mg, 0.77 mmol) in CH<sub>2</sub>Cl<sub>2</sub> (25 mL) containing methylene blue (10<sup>-4</sup> M) was placed in a long vial and oxygen was bubbled gently through it. The solution was cooled to 0 °C and irradiated with xenon Variac Eimac Cermac 300 W visible light lamp for 5 min after which time complete consumption of the starting material was observed (based on tlc). SiO<sub>2</sub> and a few drops of H<sub>2</sub>O were added, and the mixture was stirred vigorously for 1 h. After the filtration the solvent was removed *in vacuo*, and the residue was purified by flash column chromatography (silica gel, petroleum ether:EtOAc = 20:1 → 5:1) to afford 4-hydroxybutenolide **4** (124 mg, 52%).

**4:** <sup>1</sup>H NMR (300 MHz, CDCl<sub>3</sub>): δ = 6.82 (s, 1H), 6.75 (dt, *J*<sub>1</sub> = 15.9 Hz, *J*<sub>2</sub> = 7.0 Hz, 1H), 6.02 (d, *J* = 15.9 Hz, 1H), 4.23 (brs, 1-OH), 2.14 (q, *J* = 7.0 Hz, 2H), 1.68 (s, 3H), 1.41 (m, 2H), 1.24 (brs, 18H), 0.86 (t, *J* = 6.6 Hz, 3H); <sup>13</sup>C NMR (75 MHz, CDCl<sub>3</sub>): δ = 170.3, 144.1, 140.9, 130.7, 117.8, 104.1, 33.5, 31.9, 29.7 (2C), 29.6 (2C), 29.5, 29.3, 29.2, 28.6, 24.8, 22.7, 14.1 ppm. HRMS (TOF ESI): calcd for C<sub>19</sub>H<sub>32</sub>NaO<sub>3</sub>: 331.2244 [M + Na]<sup>+</sup>; found: 331.2236.

### Formation of α,γ-disubstituted butenolide **13**

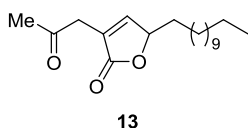

A solution of hydroxybutenolide **4** (63 mg, 0.20 mmol), in toluene (1 mL) was heated in a sealed tube at 110 °C for 12 hours. The reaction mixture was left to cool to room temperature and concentrated *in vacuo*. The residue was purified by flash column chromatography (silica gel, petroleum ether:EtOAc = 10:1→2:1) to afford disubstituted butenolide **13** (26 mg, 42%).

**13:** <sup>1</sup>H NMR (300 MHz, CDCl<sub>3</sub>): δ = 7.37 (d, *J* = 1.5 Hz, 1H), 4.98 (m, 1H), 3.44 (s, 2H), 2.25 (s, 3H), 1.70 (m, 2H), 1.24 (brs, 20H), 0.87 (t, *J* = 6.7 Hz, 3H); <sup>13</sup>C NMR (75 MHz, CDCl<sub>3</sub>): δ = 203.1, 173.4, 152.2, 126.5, 82.0, 38.8, 33.3, 31.9, 30.2, 29.6(3C), 29.5,

29.3(3C), 25.0, 22.6, 14.1 ppm. HRMS (TOF ESI): calcd for  $C_{19}H_{32}NaO_3$ : 331.2244 [ $M + Na$ ] $^+$ ; found: 331.2237.

**[4+2]-Dimerization/ketalization/epimerization of the 4-hydroxybutenolide **4** to paracaseolide A (**1**)**

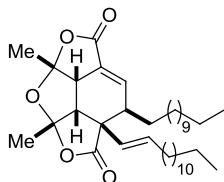

**1:** Paracaseolide A

A solution of 4-hydroxybutenolide **4** (71 mg, 0.23 mmol) was heated neat in a sealed tube at 110 °C for 12 hours. The reaction was left to cool to room temperature. The crude  $^1H$ -NMR revealed the formation of a mixture of paracaseolide A (**1**) and the byproduct butenolide **13** in 3:1 ratio. The mixture was purified by flash column chromatography (silica gel, petroleum ether:EtOAc = 20:1→5:1) to afford paracaseolide A **1** as an amorphous white powder (41 mg, 59%).

**1:**  $^1H$  NMR (300 MHz,  $CDCl_3$ ):  $\delta$  = 7.25 (dd,  $J_1$  = 7.5 Hz,  $J_2$  = 3.1 Hz, 1H), 5.83 (dt,  $J_1$  = 15.7 Hz,  $J_2$  = 6.9 Hz, 1H), 5.48 (d,  $J$  = 15.7 Hz, 1H), 3.37 (dd,  $J_1$  = 9.5 Hz,  $J_2$  = 3.1 Hz, 1H), 3.30 (d,  $J$  = 9.5 Hz, 1H), 3.04 (m, 1H), 2.11 (m, 2H), 1.76 (s, 3H), 1.67 (m, 1H), 1.62 (s, 3H), 1.25 (brs, 41H), 0.88 (t,  $J$  = 6.7 Hz, 6H) ;  $^{13}C$  NMR (75 MHz,  $CDCl_3$ ):  $\delta$  = 175.0, 166.1, 144.7, 135.1, 129.3, 126.3, 115.3, 113.8, 58.3, 50.3, 46.7, 45.1, 32.7, 31.9 (2C), 29.6 (8C), 29.5, 29.4 (2C), 29.3 (2C), 29.1, 29.0, 28.2, 28.0, 26.6, 25.7, 22.7 (2C), 14.1 (2C) ppm. HRMS (TOF ESI): calcd for  $C_{38}H_{63}O_5$ : 599.4670 [ $M + H$ ] $^+$ ; found: 599.4669.

**Part B: Copies of  $^1\text{H}$ - and  $^{13}\text{C}$ -NMR spectra**



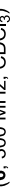

(6, 300 MHz, CDCl<sub>3</sub>)

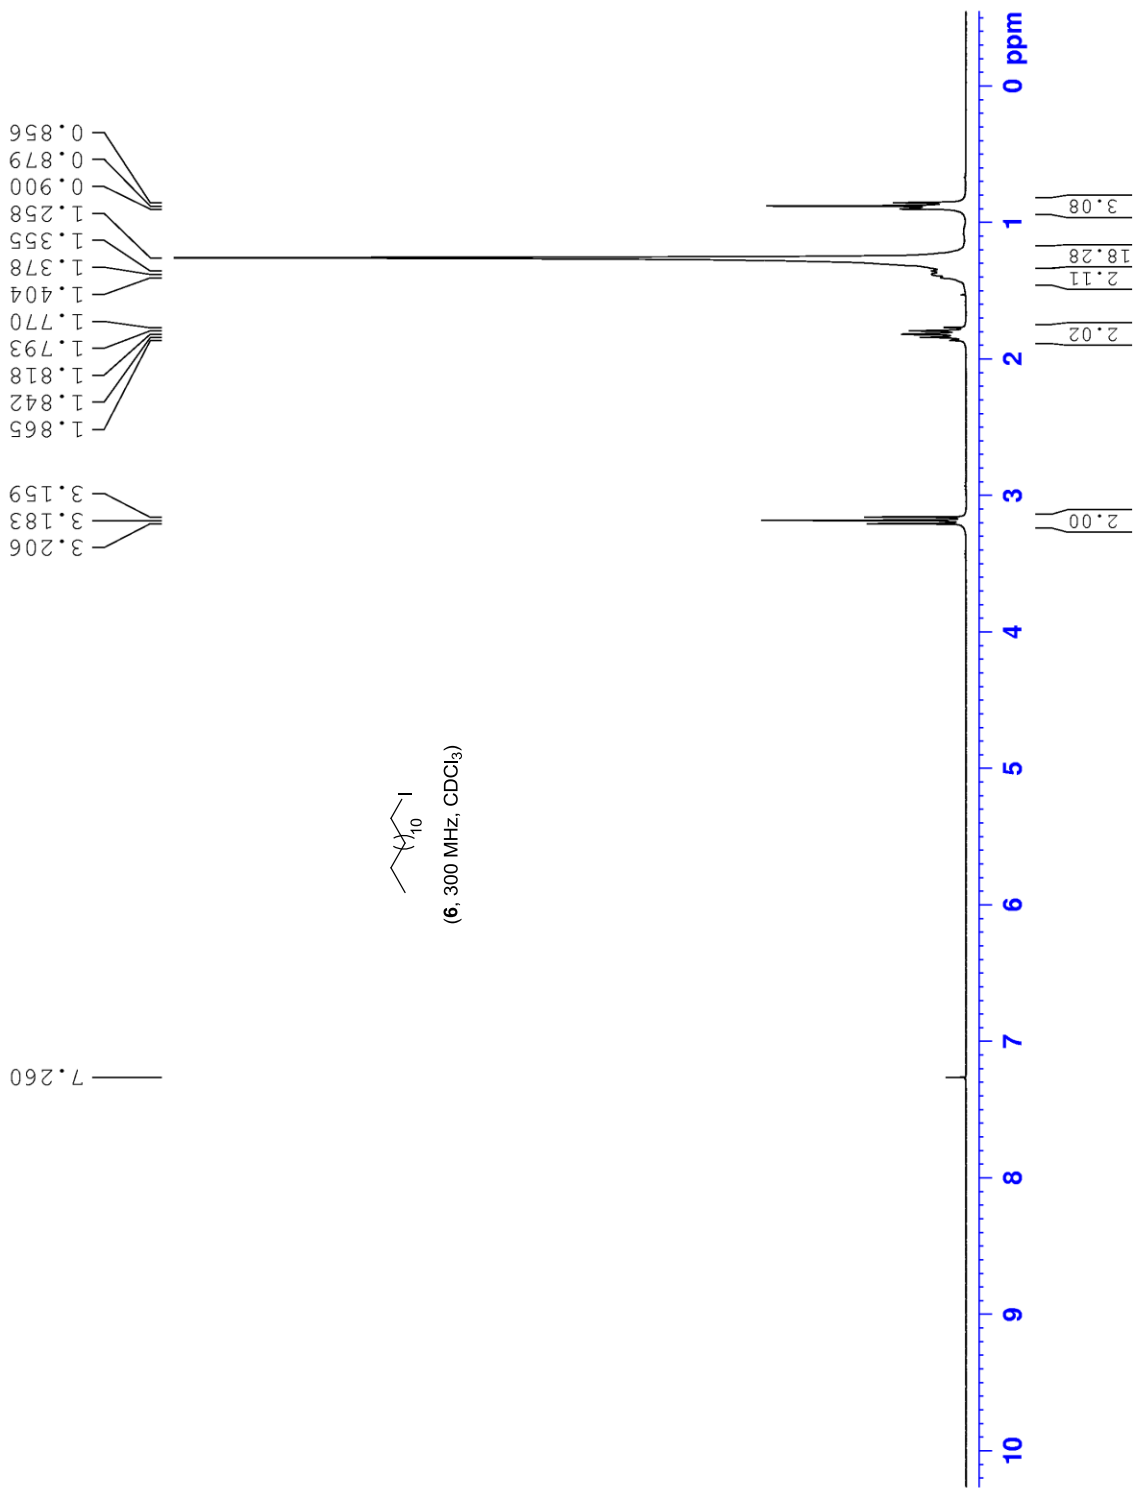

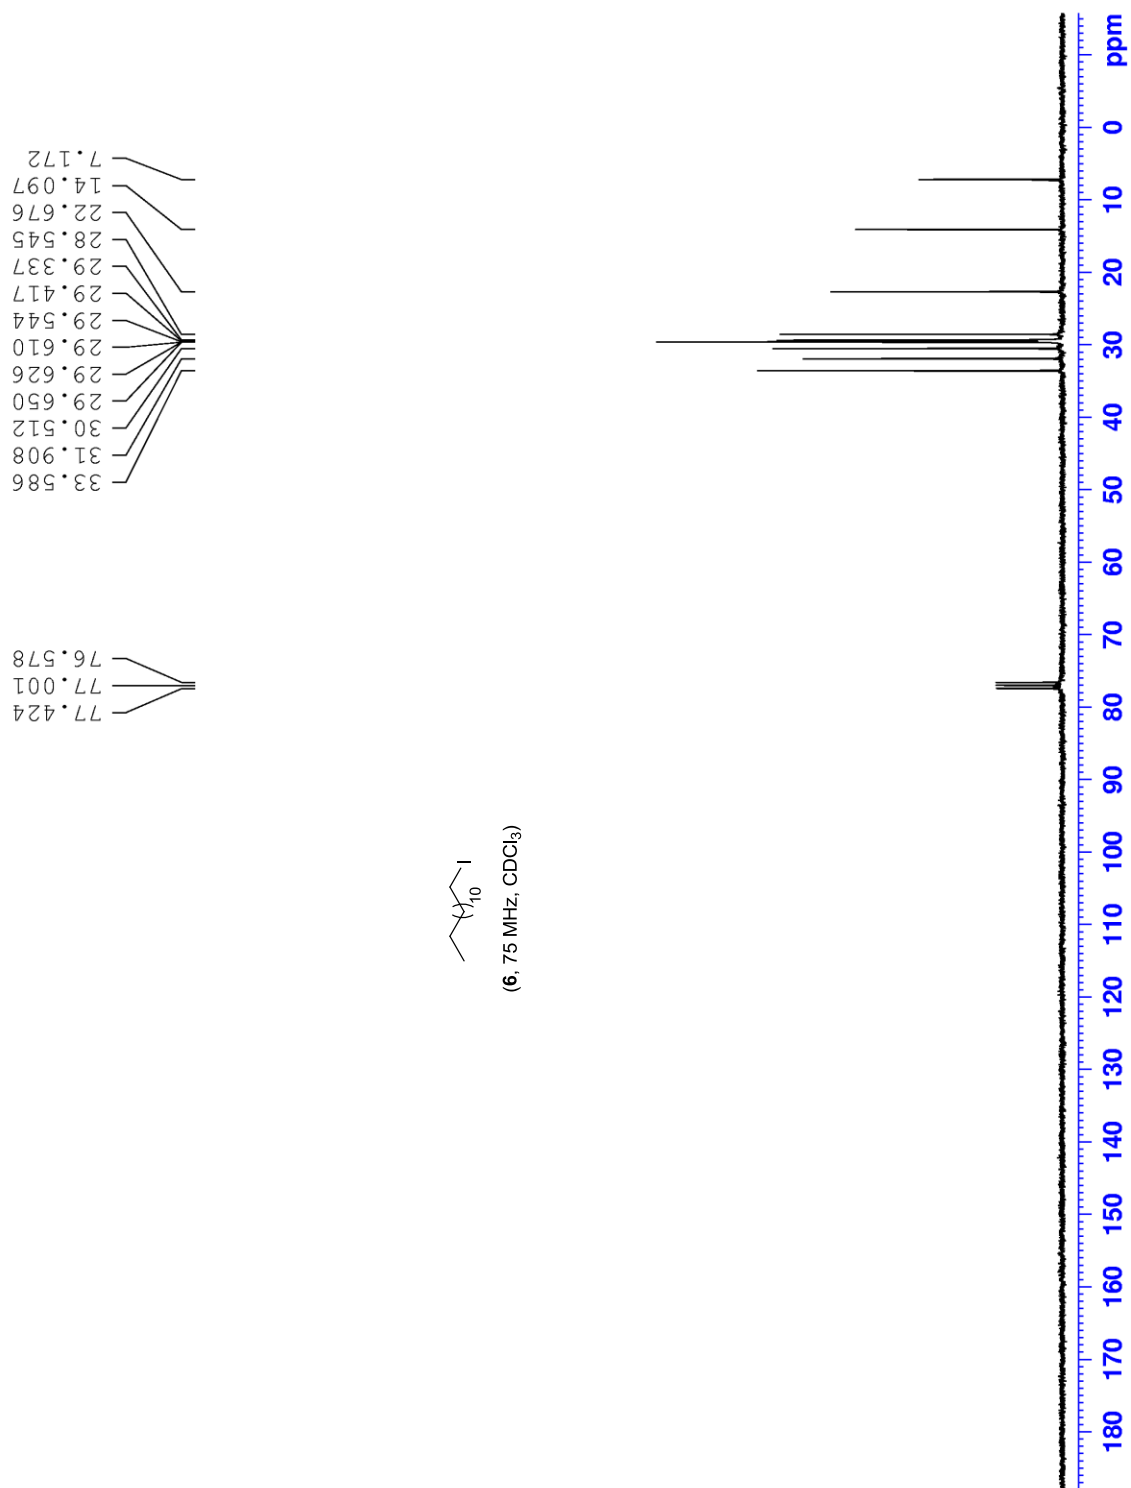

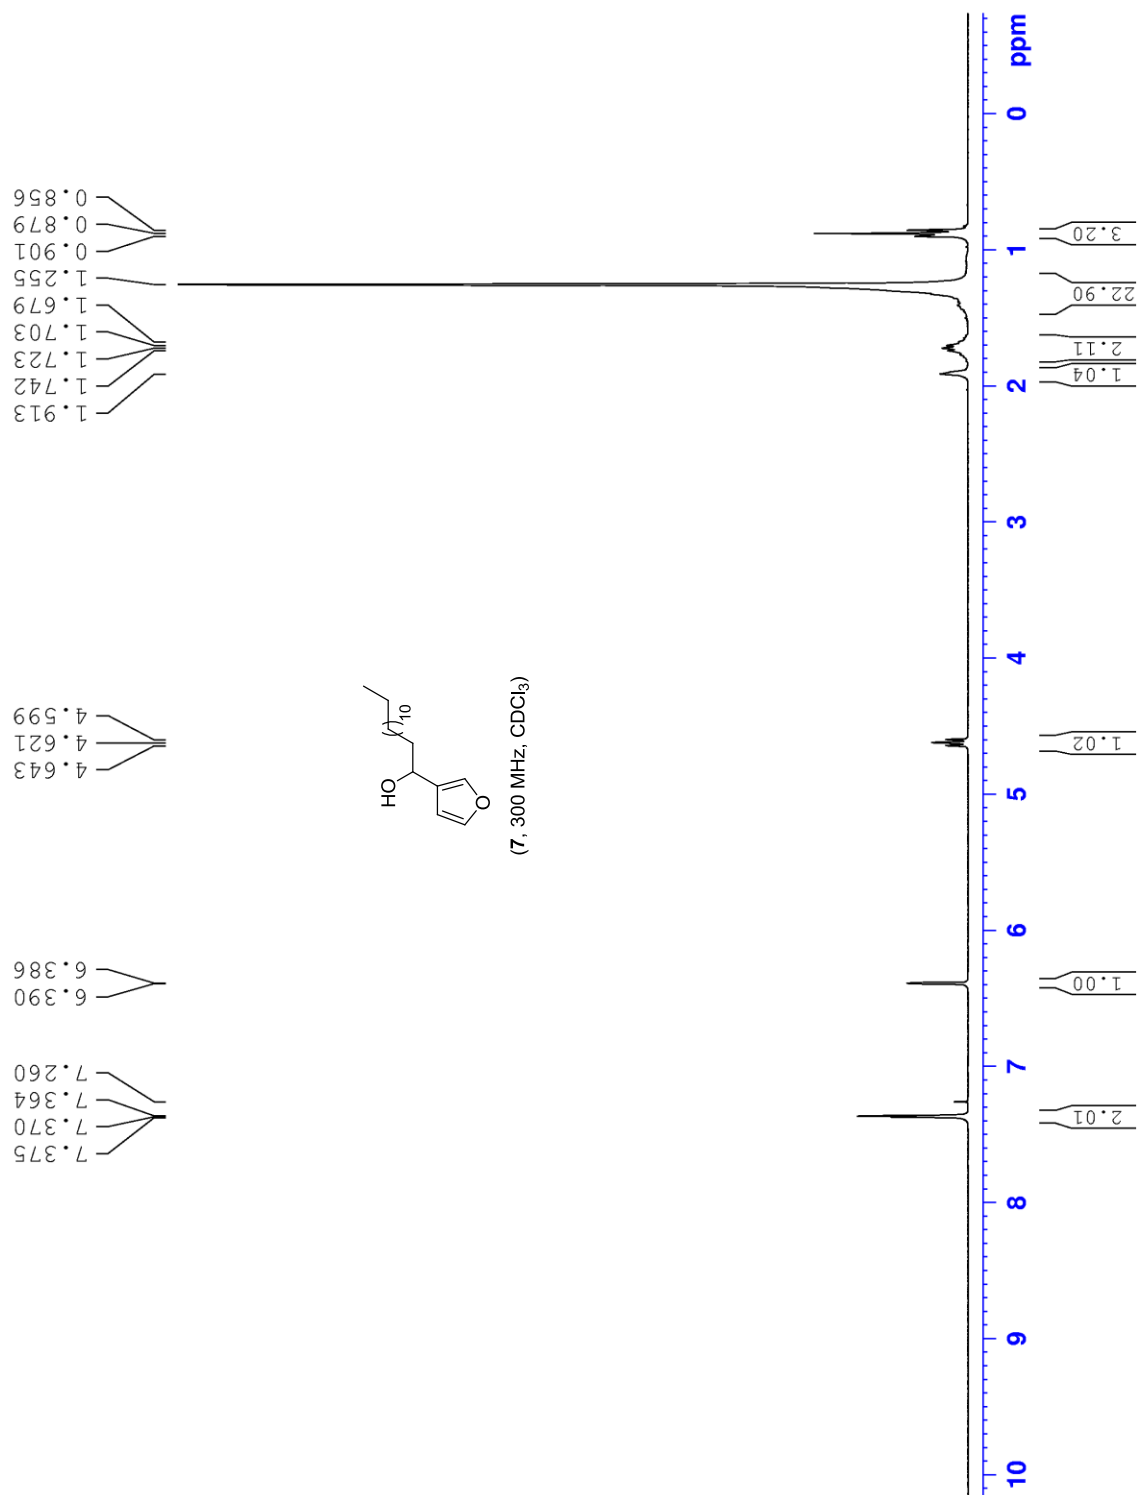

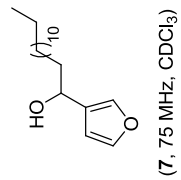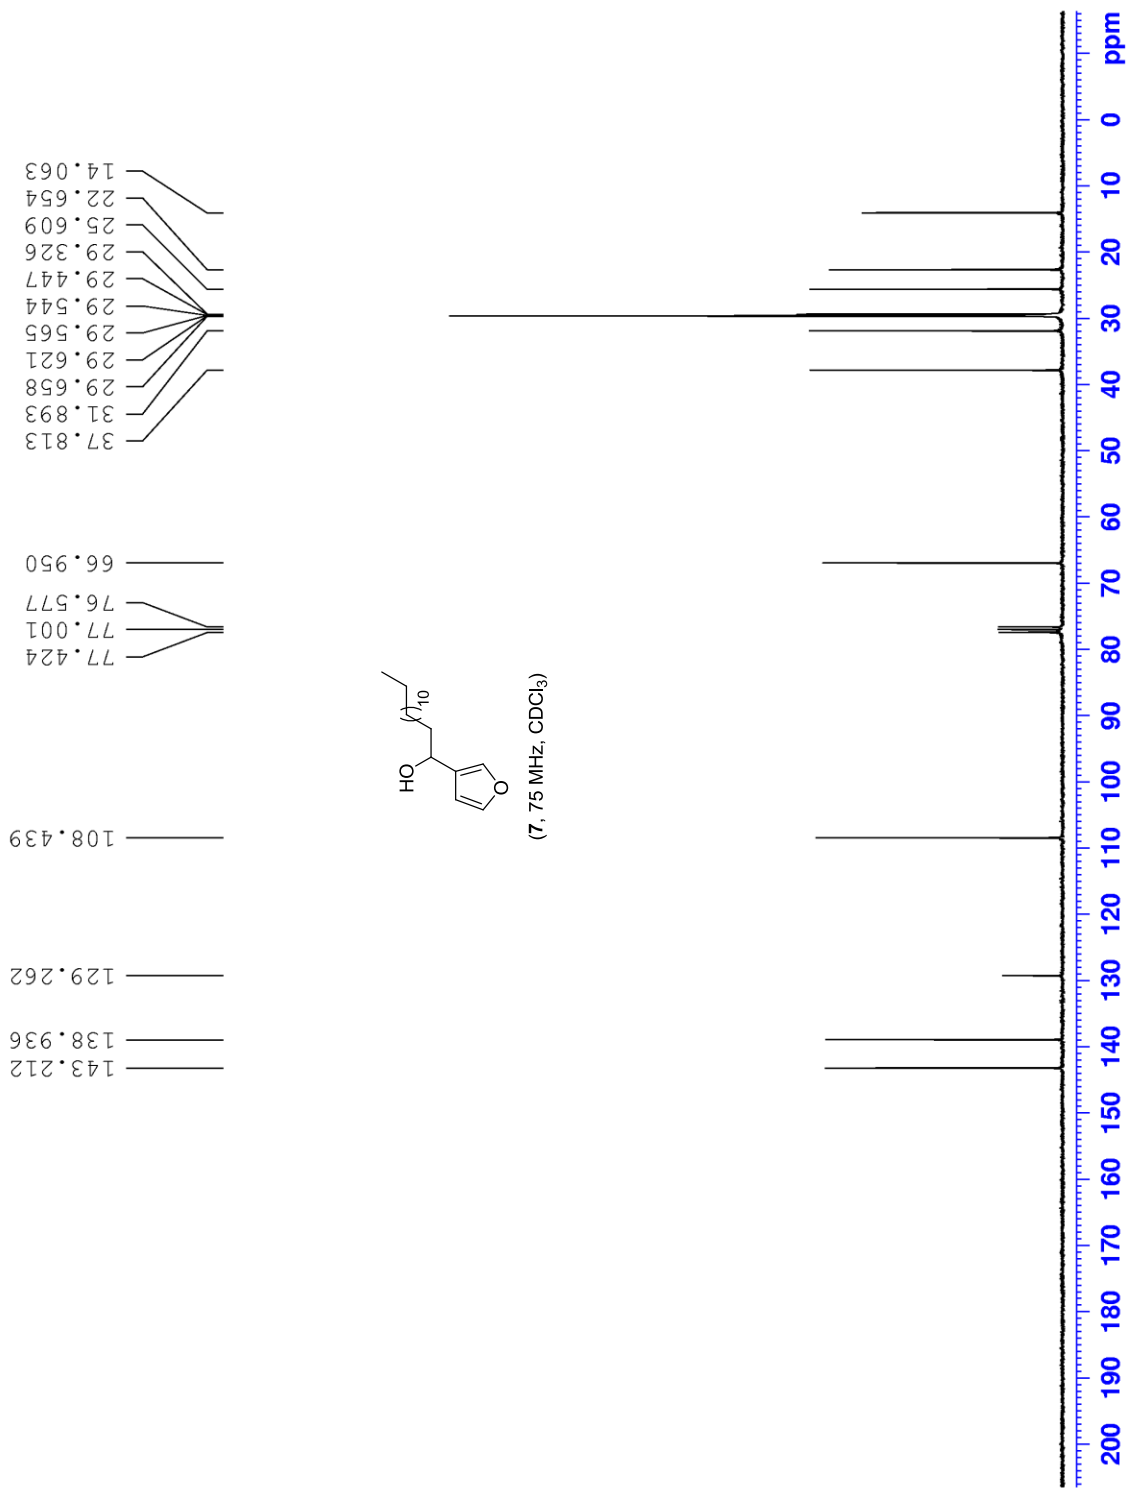

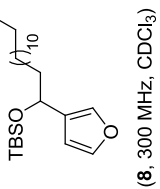

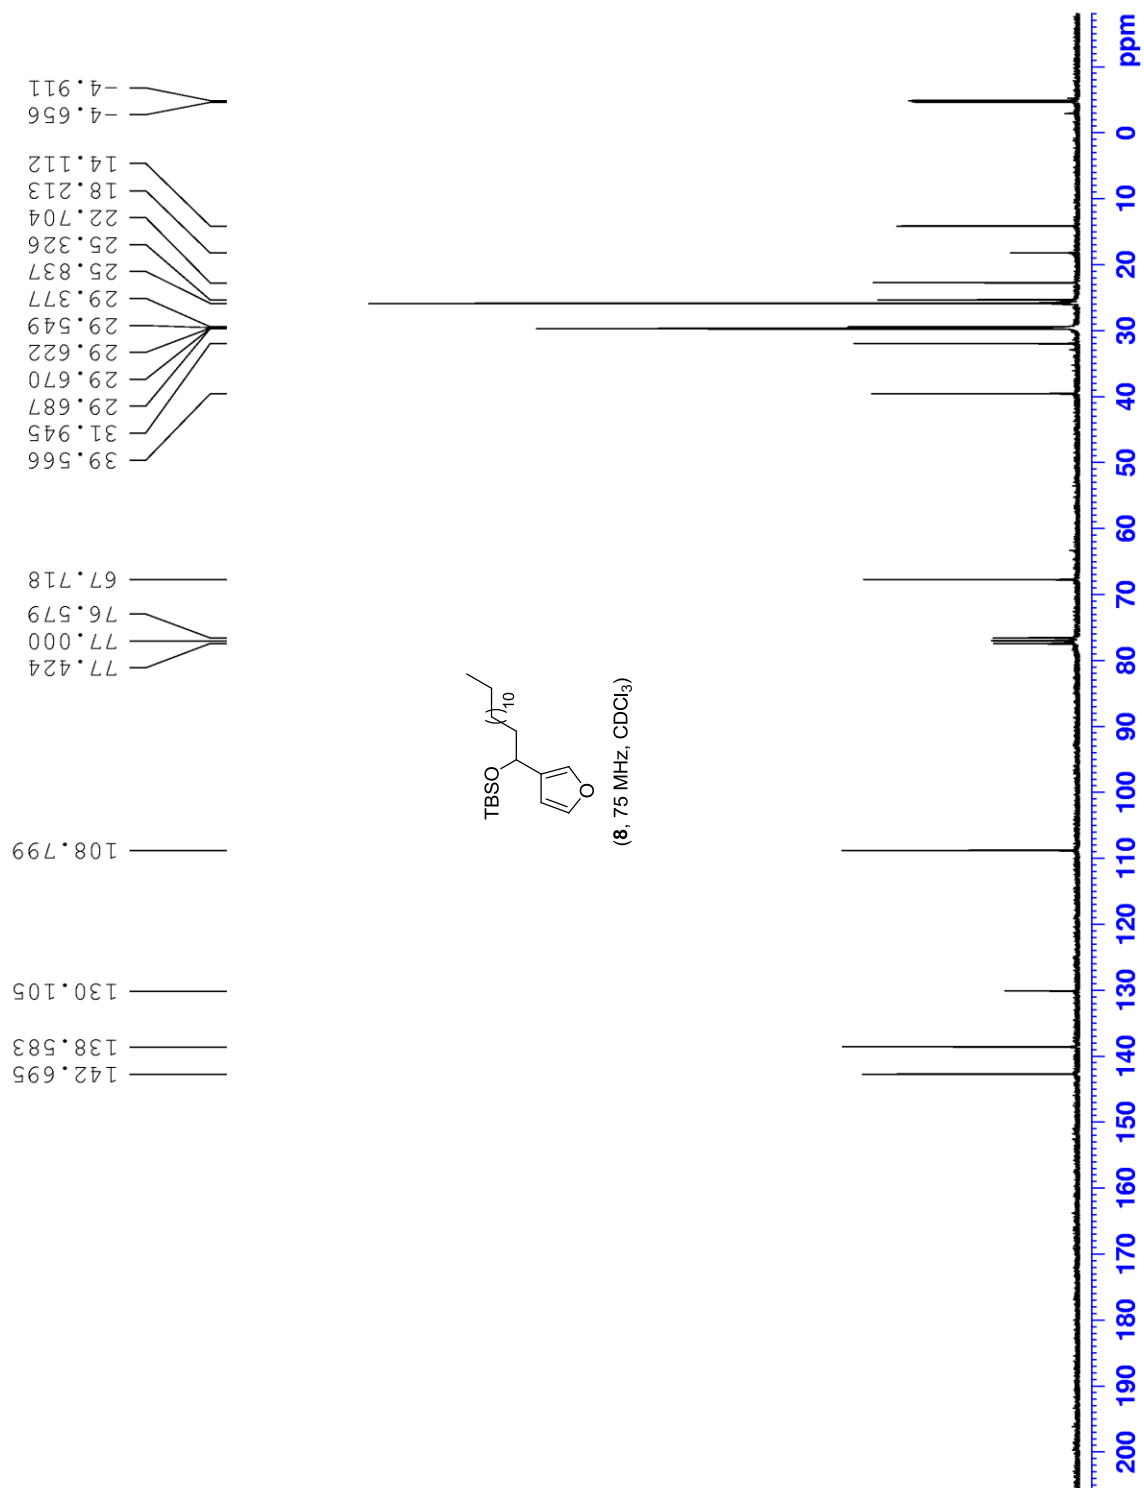

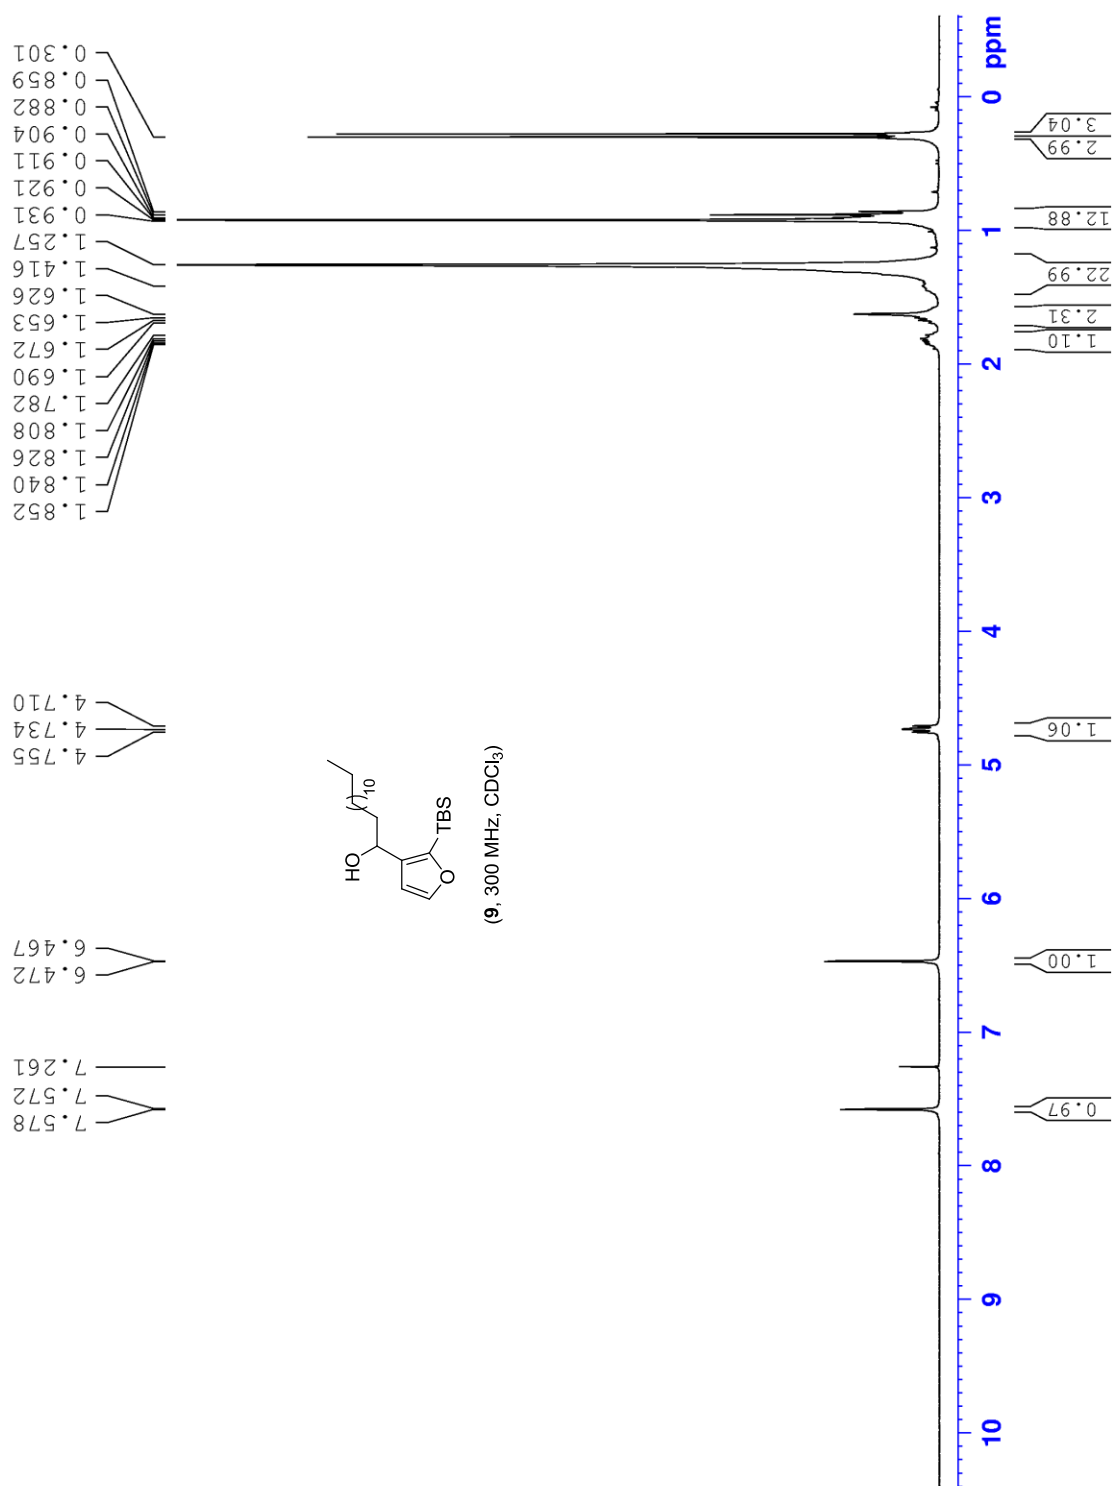

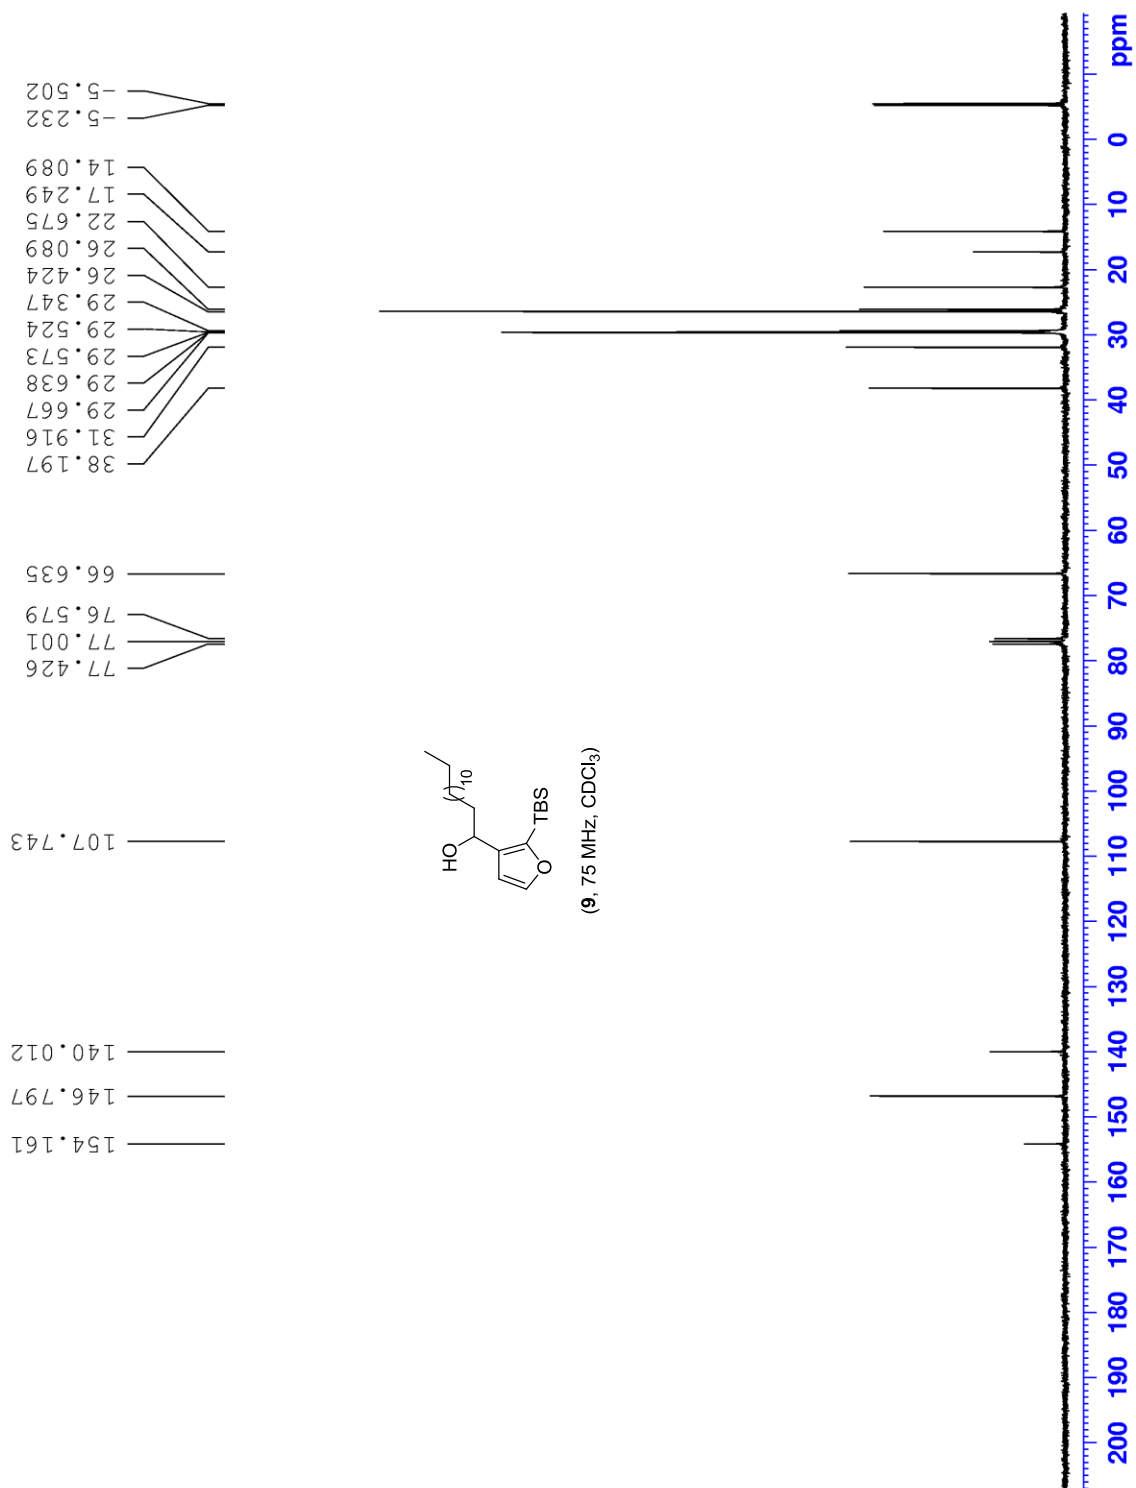



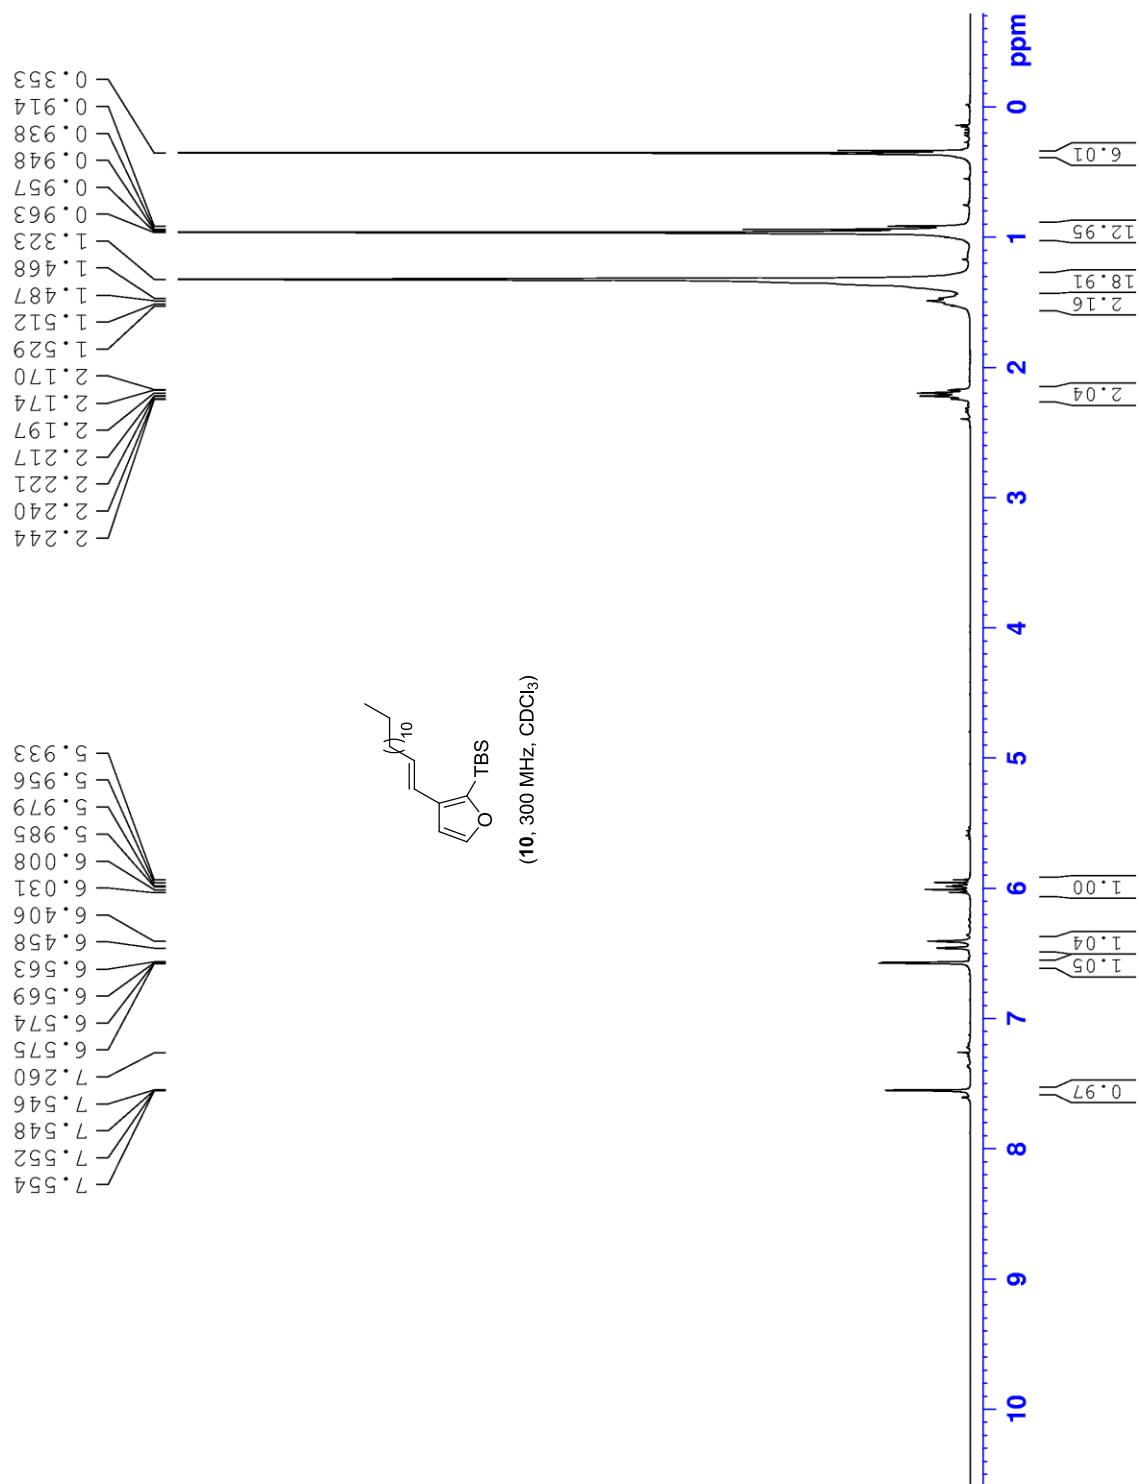

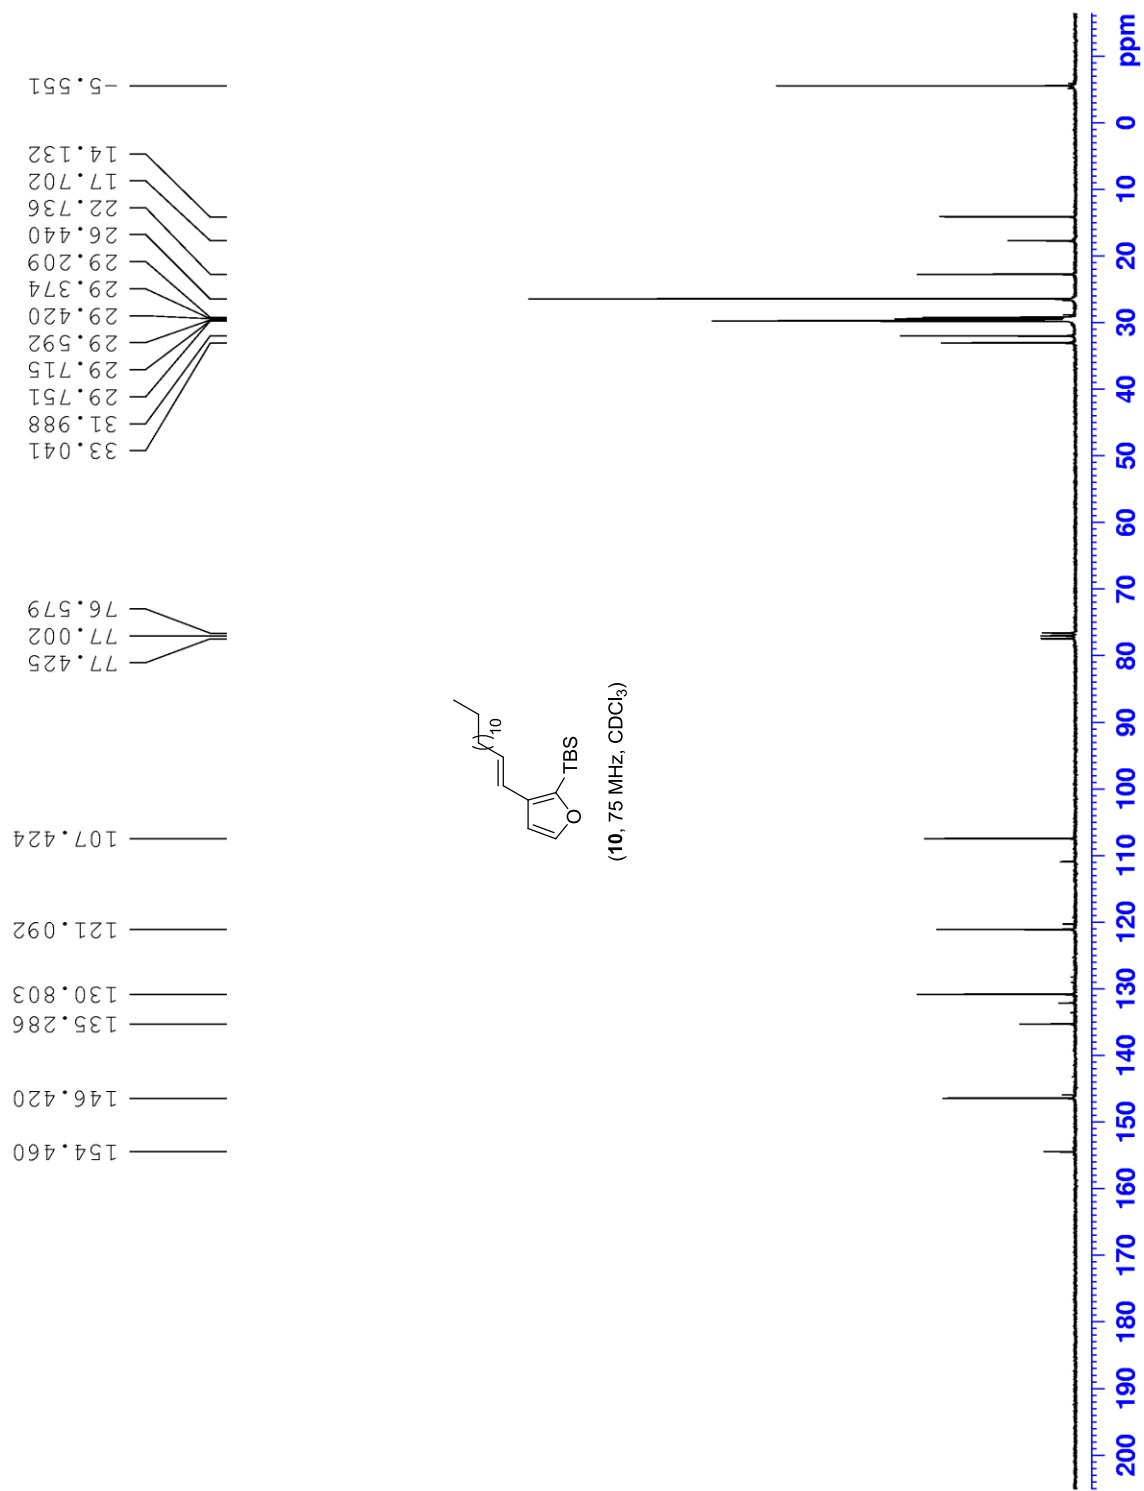

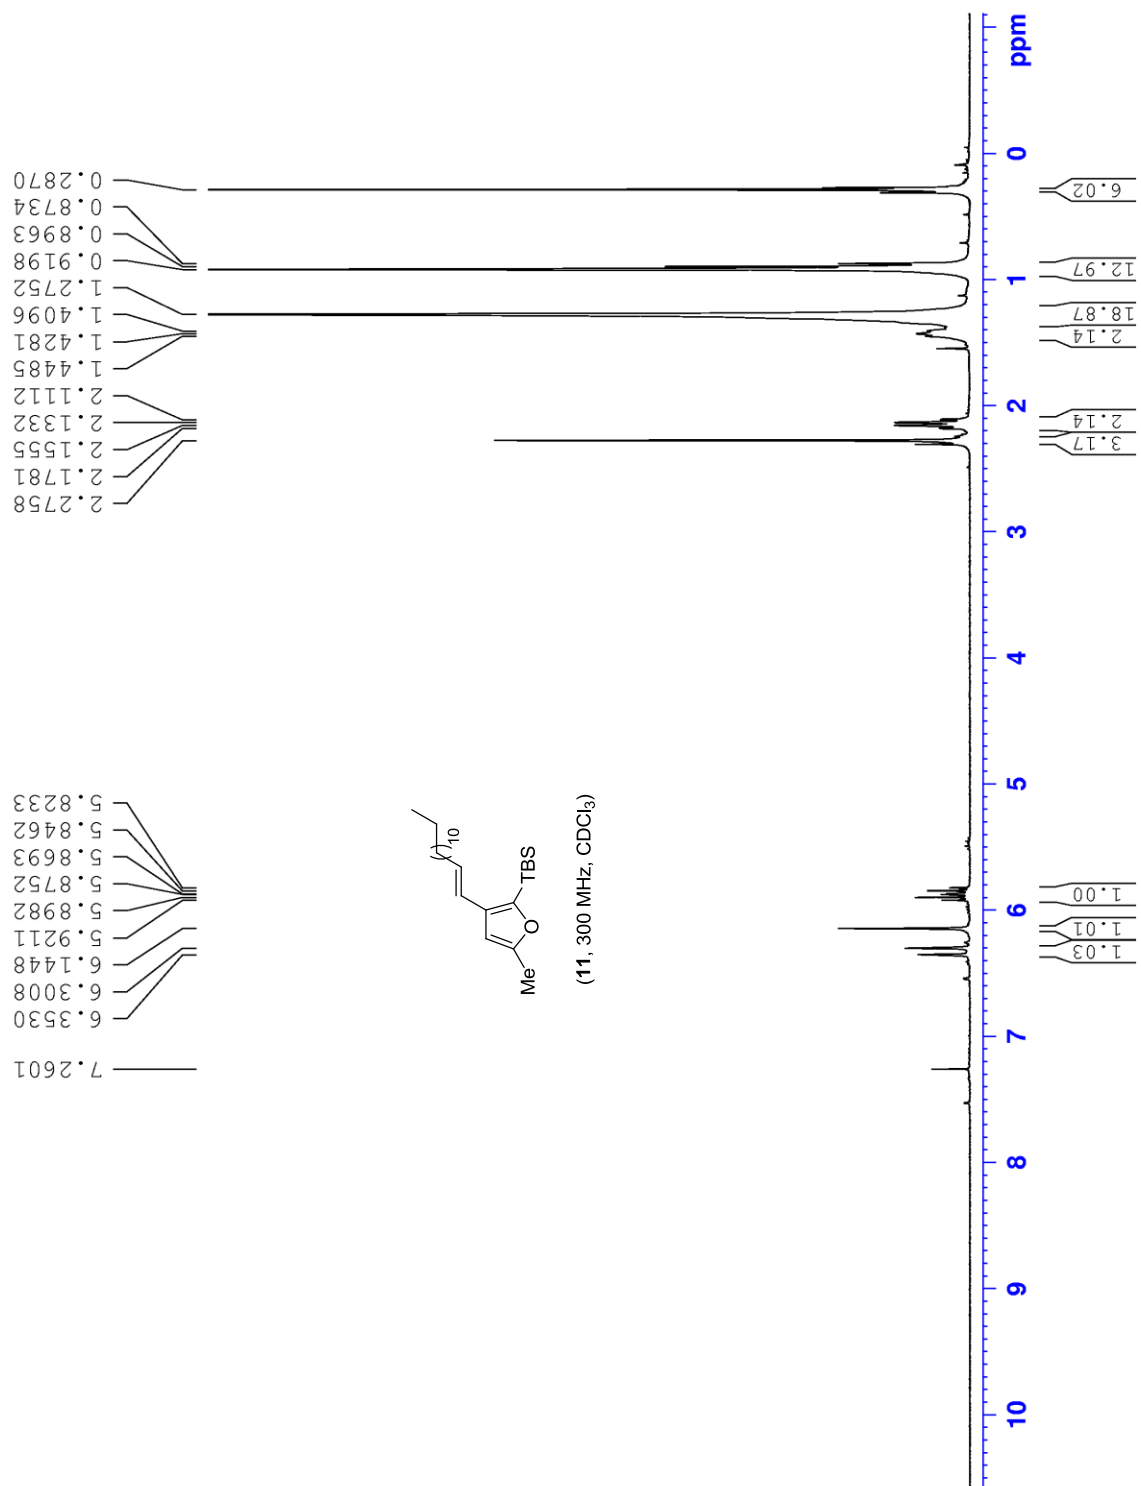

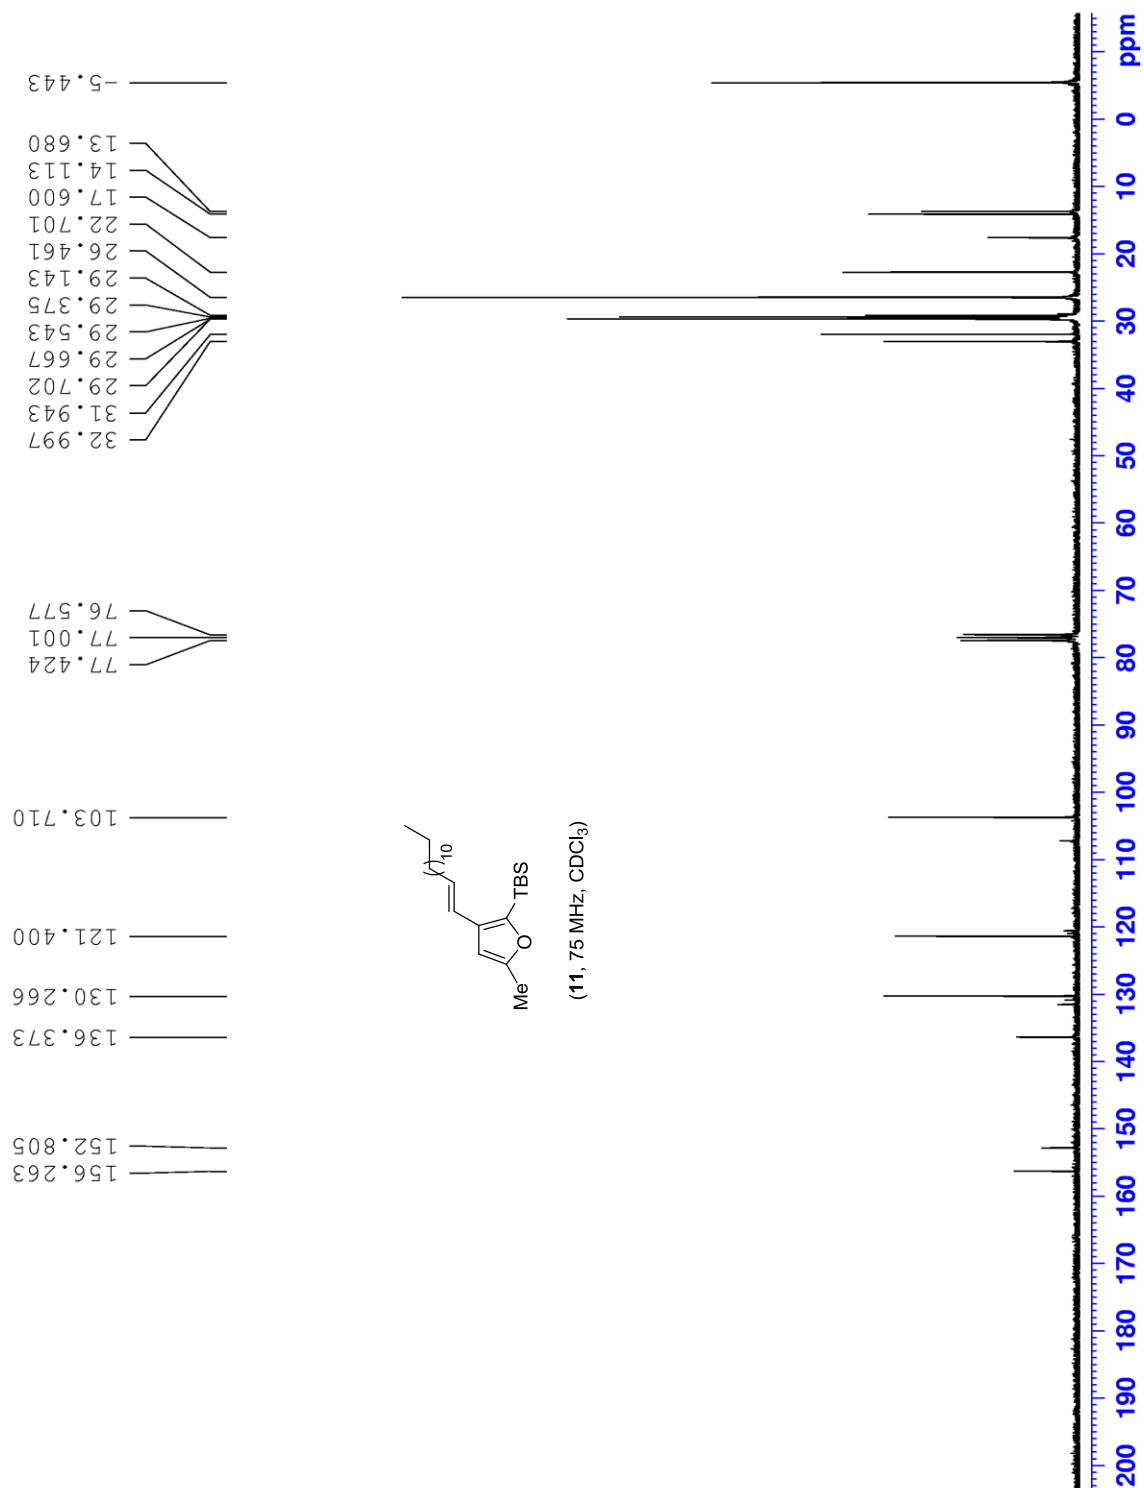

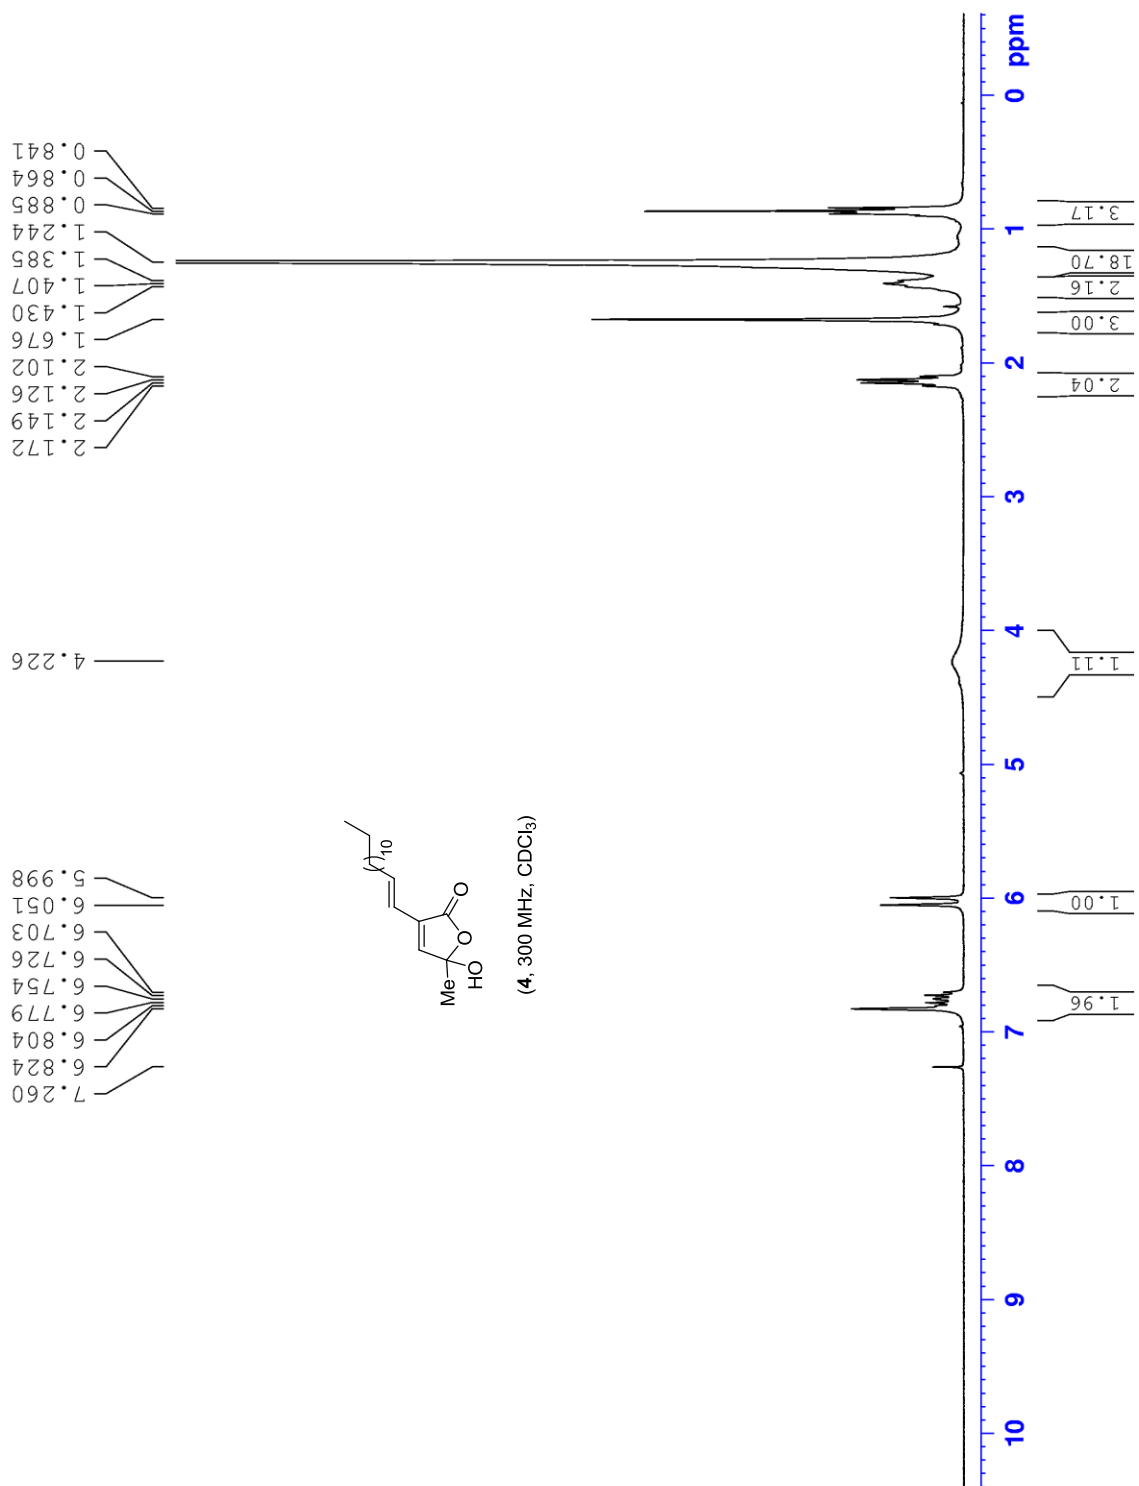

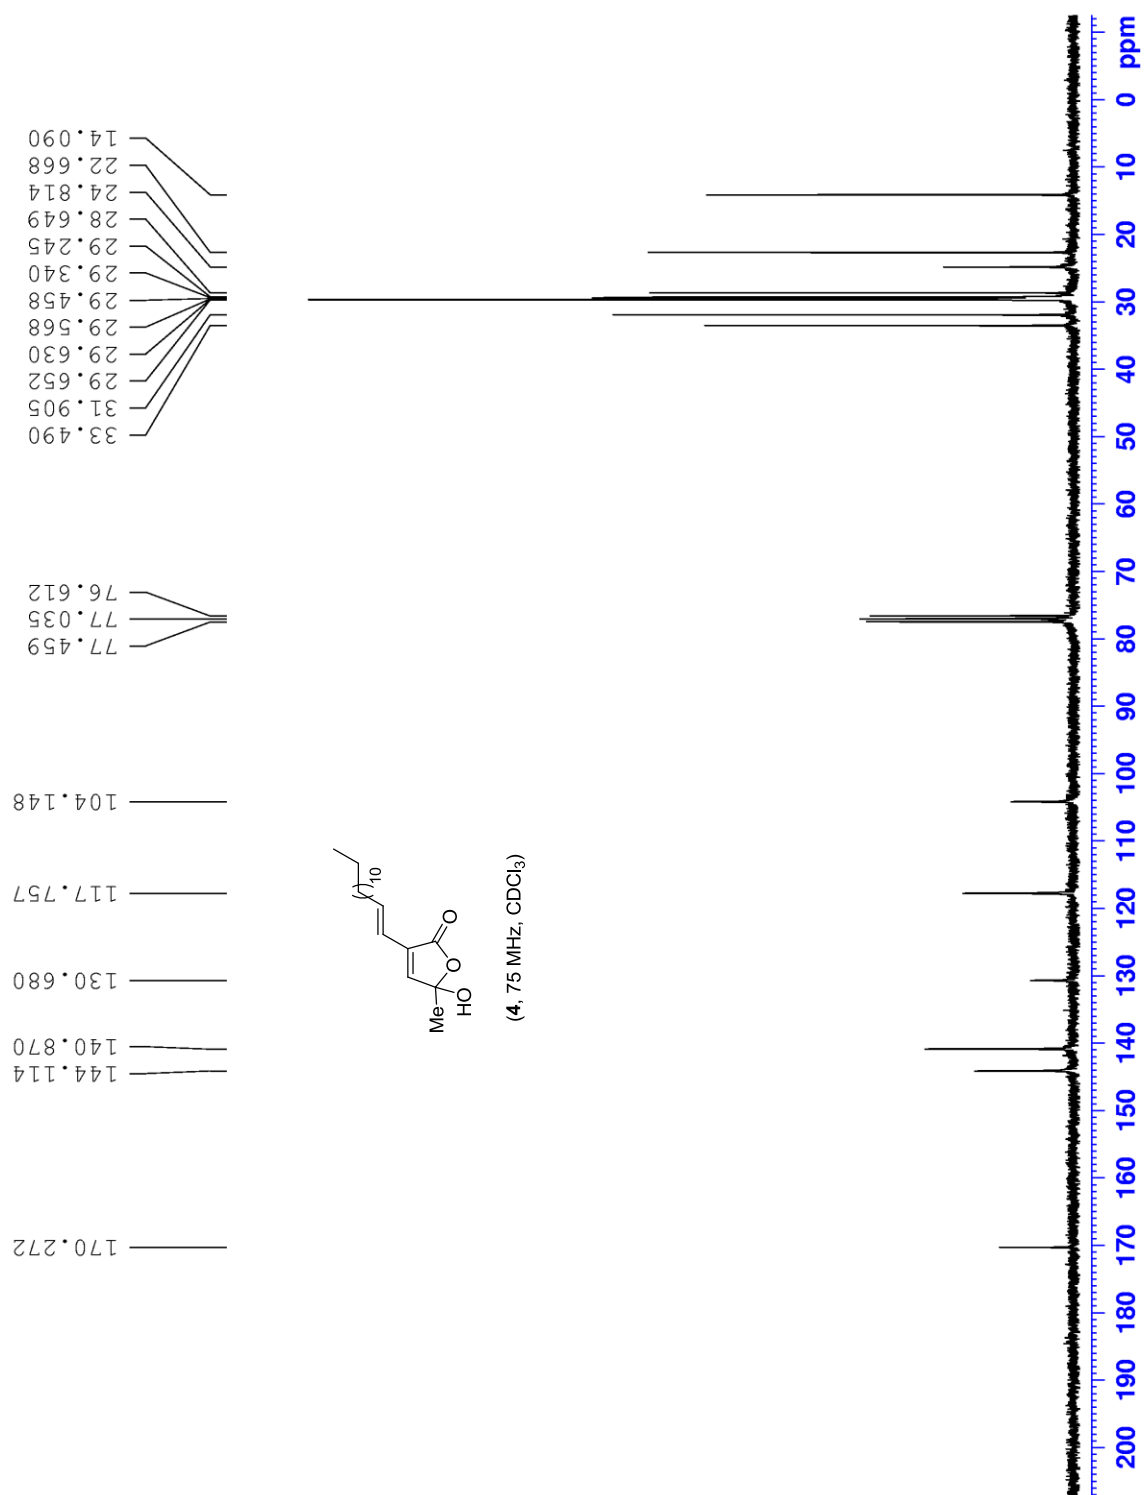

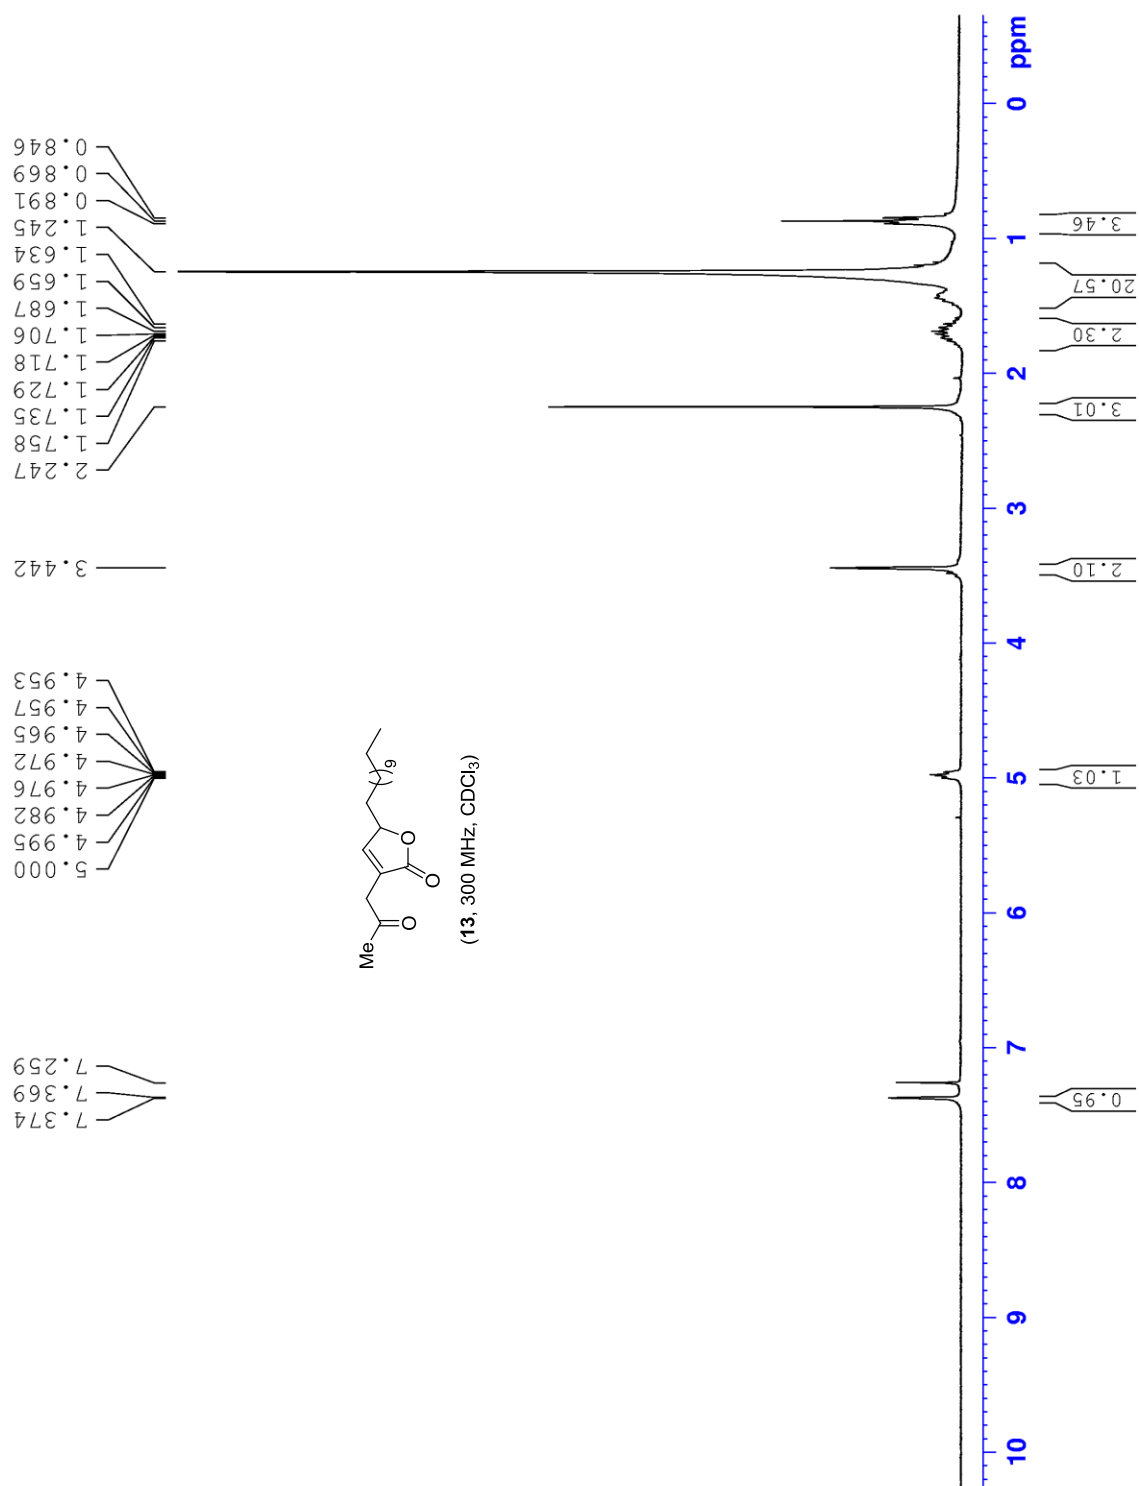

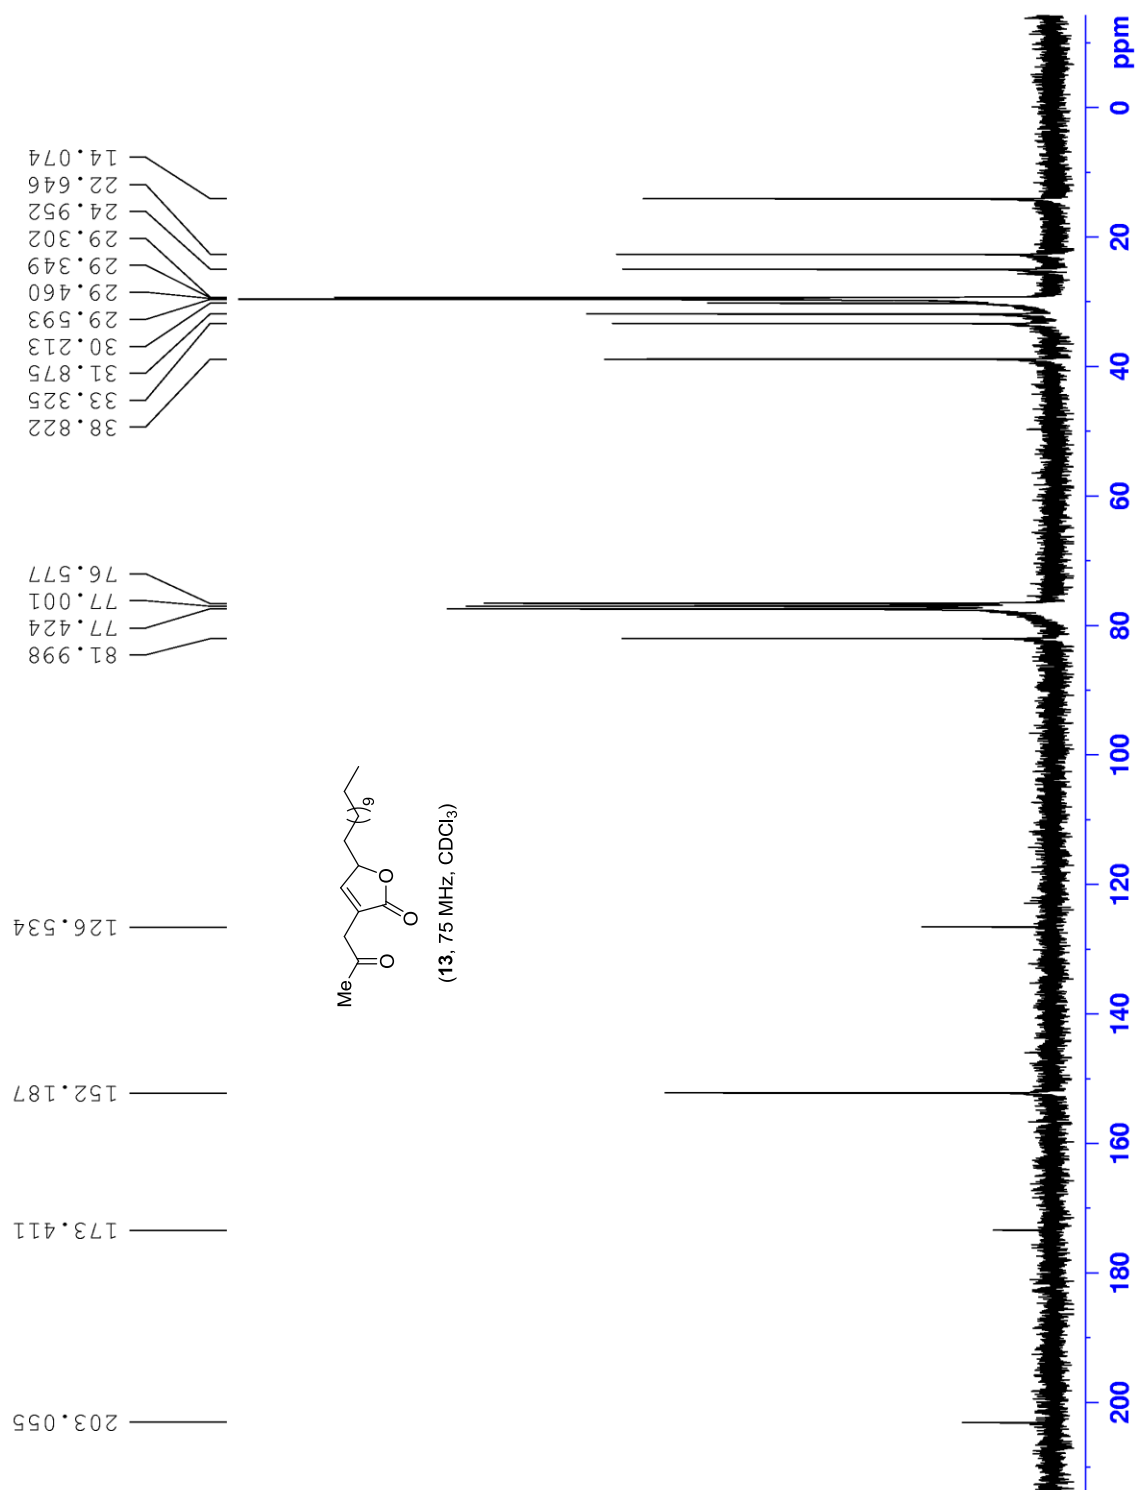



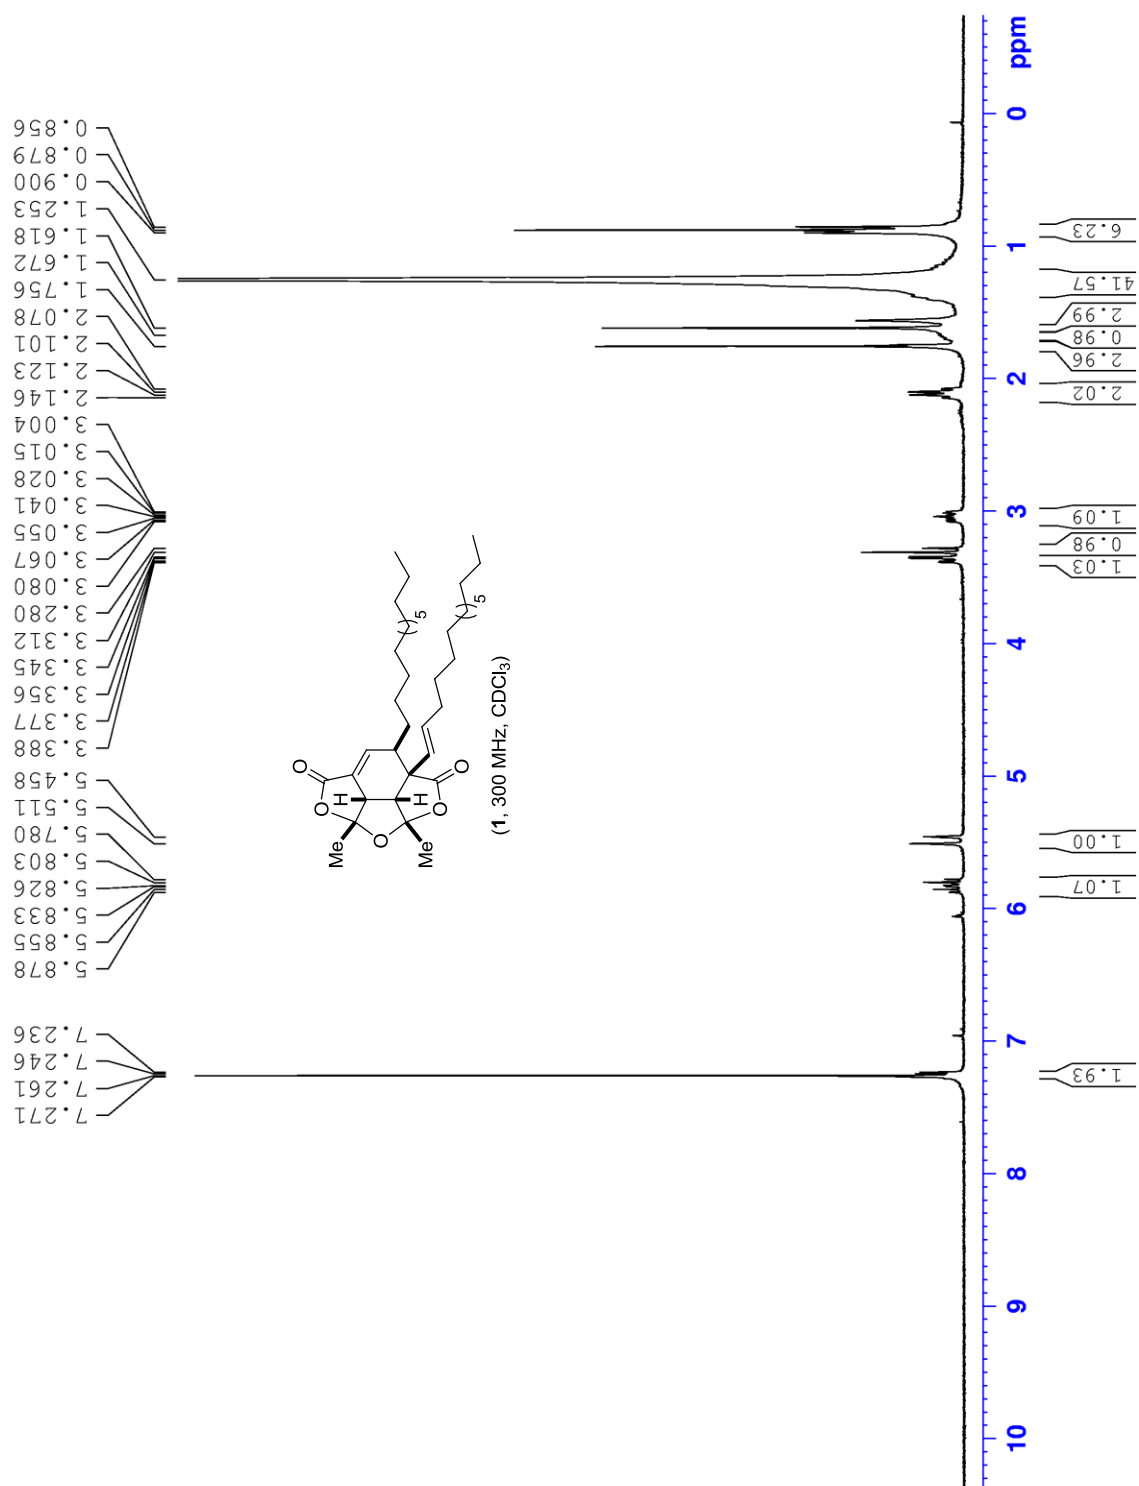

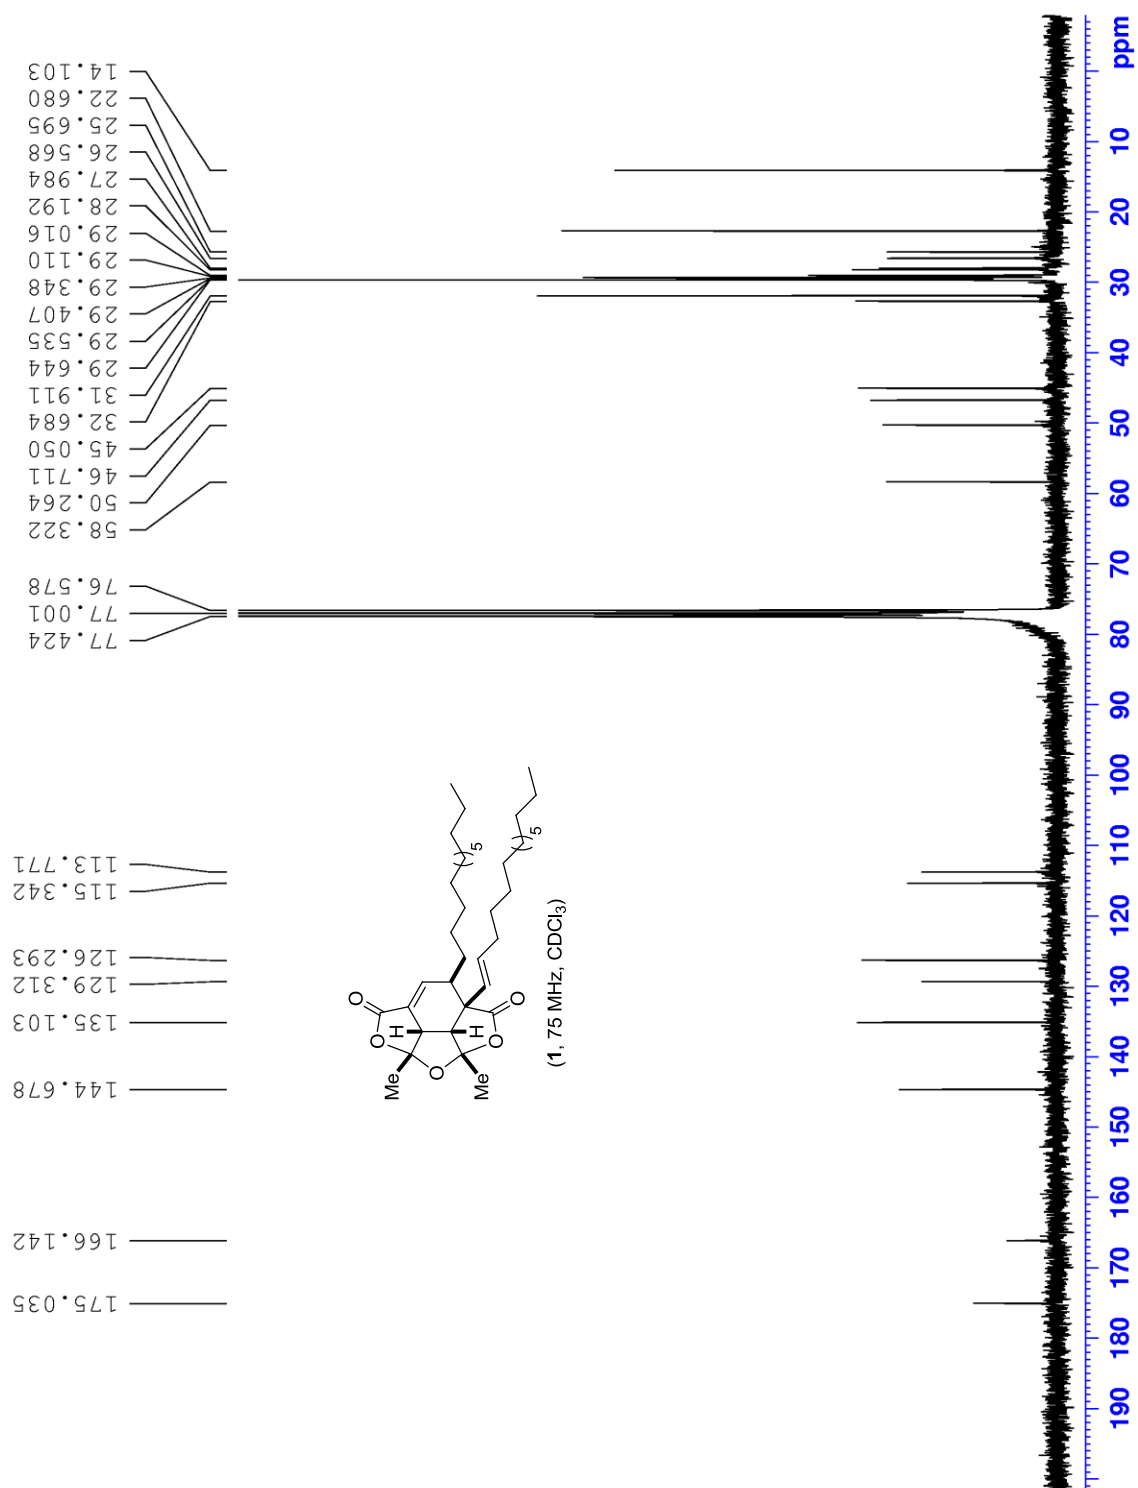

Supplement: Supplementary file 1 [file 4146499]
